# Supplementary material
Source: HighWire-hosted journal article supplement (https://bmjopen.bmj.com/content/12/6/e058769)
Supplement: inline-supplementary-material-1 [file inline-supplementary-material-1.pdf]

## Supplemental File

Table 1: Radicular low back pain inclusion codes with Boolean "OR"

| ICD-10 Code | ICD-10 Definition                                               |
|-------------|-----------------------------------------------------------------|
| G54.4       | Lumbosacral root disorders, not elsewhere classified            |
| M54.16      | Intervertebral disc disorders with radiculopathy, lumbar region |
| M54.17      | Radiculopathy, lumbosacral region                               |
| M54.18      | Radiculopathy, sacral and sacrococcygeal region                 |
| M54.3       | Sciatica                                                        |
| M54.4       | Lumbago with sciatica                                           |

Abbreviations: International Classification of Diseases (ICD)

Table 2: Additional inclusion/exclusion codes based on receipt of chiropractic spinal manipulative therapy

| CPT code | Definition        | Recipients of CSMT | Nonrecipients of CSMT |
|----------|-------------------|--------------------|-----------------------|
| 98940    | CSMT, 1-2 regions | Included           | Excluded              |
| 98941    | CSMT, 3-4 regions | Included           | Excluded              |
| 98942    | CSMT, 5 regions   | Included           | Excluded              |

Abbreviations: Current Procedural Terminology (CPT), Chiropractic Spinal Manipulative Therapy (CSMT)

Table 3: Exclusion codes for both cohorts

| ICD-10 Code                                                                                                              | ICD-10 Definition                                                                     |
|--------------------------------------------------------------------------------------------------------------------------|---------------------------------------------------------------------------------------|
| Serious spinal pathology                                                                                                 |                                                                                       |
| G06                                                                                                                      | Intracranial and intraspinal abscess and granuloma                                    |
| G83.4                                                                                                                    | Cauda equina syndrome                                                                 |
| M46                                                                                                                      | Other inflammatory spondyloarthropathies (includes infections)                        |
| M48.4                                                                                                                    | Fatigue fracture of vertebra                                                          |
| M48.5                                                                                                                    | Collapsed vertebra, not elsewhere classified                                          |
| M80                                                                                                                      | Osteoporosis with current pathological fracture                                       |
| M81                                                                                                                      | Osteoporosis without current pathological fracture                                    |
| C00-C96                                                                                                                  | Malignant neoplasm                                                                    |
| Structural deformity                                                                                                     |                                                                                       |
| M41                                                                                                                      | Scoliosis                                                                             |
| M43.16                                                                                                                   | Spondylolisthesis, lumbar region                                                      |
| M43.17                                                                                                                   | Spondylolisthesis, lumbosacral region                                                 |
| Prior lumbar surgery                                                                                                     |                                                                                       |
| M96.1                                                                                                                    | Postlaminectomy syndrome, not elsewhere classified                                    |
| Z98.1                                                                                                                    | Arthrodesis status                                                                    |
| Alternate neurological lesion                                                                                            |                                                                                       |
| G54.1                                                                                                                    | Lumbosacral plexus disorders                                                          |
| G95                                                                                                                      | Other and unspecified diseases of spinal cord                                         |
| G99.2                                                                                                                    | Myelopathy in diseases classified elsewhere                                           |
| M48.0                                                                                                                    | Spinal stenosis                                                                       |
| M50.0                                                                                                                    | Cervical disc disorder with myelopathy                                                |
| M51.0                                                                                                                    | Thoracic, thoracolumbar and lumbosacral intervertebral disc disorders with myelopathy |
| Contraindications to benzodiazepines                                                                                     |                                                                                       |
| O00-O9A                                                                                                                  | Pregnancy, childbirth and the puerperium                                              |
| E80                                                                                                                      | Disorders of porphyrin and bilirubin metabolism                                       |
| H40.2                                                                                                                    | Primary angle-closure glaucoma                                                        |
| J44                                                                                                                      | Other chronic obstructive pulmonary disease                                           |
| G70.0                                                                                                                    | Myasthenia gravis                                                                     |
| G20                                                                                                                      | Parkinson's disease                                                                   |
| Benzodiazepine prescription (VANDF)                                                                                      |                                                                                       |
| CN302                                                                                                                    | Benzodiazepines                                                                       |
| Abbreviations: International Classification of Diseases (ICD), Veterans Health Administration National Drug File (VANDF) |                                                                                       |

Table 4: Variables controlled for in propensity score matching

| Variable                                 | Description                                              |
|------------------------------------------|----------------------------------------------------------|
| Demographics                             | Patient age, sex, race, and ethnicity                    |
| Diagnoses (ICD-10)                       |                                                          |
| F01-F99                                  | Mental, behavioral and neurodevelopmental disorders      |
| G00-G99                                  | Diseases of the nervous system                           |
| Z72.0                                    | Tobacco use                                              |
| Benzodiazepine precaution                |                                                          |
| K76                                      | Other diseases of liver                                  |
| N18                                      | Chronic kidney disease                                   |
| Prescription medications (VANDF Classes) |                                                          |
| CN101                                    | Opioid analgesics                                        |
| CN309                                    | Sedatives/hypnotics, other (includes nonbenzodiazepines) |
| CN800                                    | CNS stimulants                                           |
| Procedures (CPT codes)                   |                                                          |
| 99281-99285                              | Emergency department visit                               |

Abbreviations: Central nervous system (CNS), Current Procedural Terminology (CPT), International Classification of Diseases (ICD), Veterans Health Administration National Drug File (VANDF)

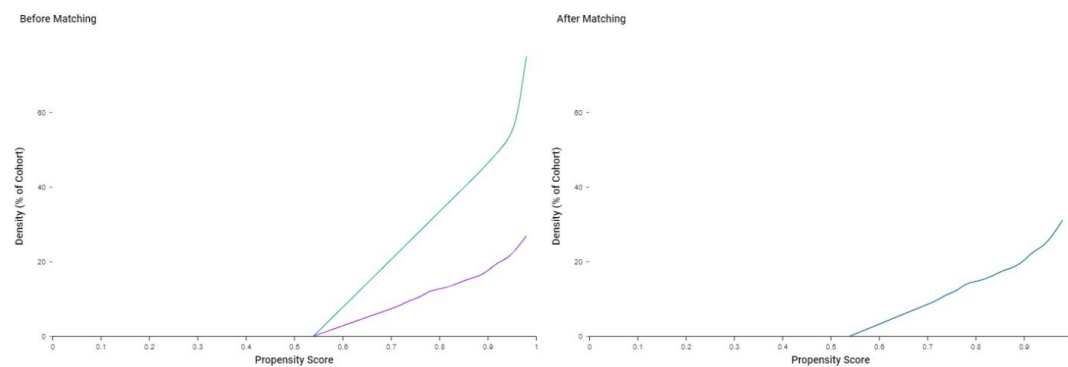

Figure 1: Propensity scores before and after matching. Purple line represents recipients of chiropractic spinal manipulative therapy (CSMT) cohort while the green line represents the non-CSMT cohort.
